# Supplementary material
Source: MDPI journal article supplement (https://www.mdpi.com/2073-4395/14/5/1003)
Supplement: s1 [file s1]

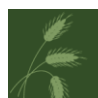

**Table S1.** Included articles focusing on the use of NMR spectroscopy and results of individual sources of evidences.

| First Author         | Atoms Studied                                                                        | NMR Spectrum Acquisition Phase | Multidimensional Techniques | Study Objects <sup>1</sup> | Using the chemical shift ranges given in Table 1 |
|----------------------|--------------------------------------------------------------------------------------|--------------------------------|-----------------------------|----------------------------|--------------------------------------------------|
| Cuniasse [1]         | <sup>13</sup> C                                                                      | in solution and solid          | 1D                          | single SOM                 | no                                               |
| Lodygin [2]          | <sup>1</sup> H, <sup>13</sup> C                                                      | solid                          | 1D                          | HA, FA                     | yes                                              |
| Mao [3]              | <sup>1</sup> H, <sup>13</sup> C, <sup>15</sup> N, <sup>31</sup> P                    | in solution and solid          | 1D, 2D                      | HA, lignin, OS             | yes                                              |
| Preston [4]          | <sup>1</sup> H, <sup>13</sup> C, R                                                   | in solution                    | 1D                          | HA, humin, DOM             | no                                               |
| Preston [13]         | <sup>1</sup> H, <sup>13</sup> C, R                                                   | in solution and solid          | 1D                          | HA, humin, DOM, OS         | no                                               |
| Keeler [20]          | <sup>13</sup> C                                                                      | solid                          | 1D                          | HA, FA, OS                 | yes                                              |
| Kulikova [23]        | <sup>13</sup> C, <sup>29</sup> Si                                                    | in solution                    | 1D                          | HS                         | no                                               |
| Knicker [24]         | <sup>13</sup> C, <sup>15</sup> N                                                     | solid                          | 1D                          | HS, OS                     | yes                                              |
| Rennert [25]         | <sup>29</sup> Si                                                                     | solid                          | 1D                          | MS                         | no                                               |
| Wang [26]            | <sup>1</sup> H, <sup>31</sup> P                                                      | in solution                    | 1D, 2D                      | HS                         | no                                               |
| Keshari [27]         | <sup>1</sup> H, <sup>13</sup> C                                                      | in solution and solid          | 1D                          | single SOM                 | no                                               |
| Vasilevich [28]      | <sup>13</sup> C                                                                      | solid                          | 1D                          | HA                         | yes                                              |
| Mao [29]             | <sup>1</sup> H, <sup>13</sup> C                                                      | solid                          | 1D, 2D                      | HA                         | yes                                              |
| Luz [31]             | <sup>13</sup> C                                                                      | solid                          | 1D, 2D                      | single SOM                 | no                                               |
| Mitchell [25]        | <sup>1</sup> H                                                                       | in solution and solid          | 1D                          | DOM                        | no                                               |
| Peuravuori [32]      | <sup>13</sup> C                                                                      | solid                          | 1D                          | FA                         | yes                                              |
| Klein [33]           | <sup>13</sup> C                                                                      | in solution                    | 1D                          | HA, FA, DOM                | yes                                              |
| Nebiosso [34]        | <sup>1</sup> H, <sup>13</sup> C                                                      | in solution and solid          | 1D, 2D                      | HA                         | no                                               |
| Mylotte [35]         | <sup>1</sup> H, <sup>13</sup> C                                                      | in solution and solid          | 1D, 2D                      | HA, humin                  | no                                               |
| DiDonato [36]        | <sup>1</sup> H, <sup>13</sup> C                                                      | in solution and solid          | 1D, 2D                      | HA                         | yes                                              |
| Soucémarianadin [37] | <sup>1</sup> H, <sup>13</sup> C                                                      | in solution and solid          | 1D, 2D                      | OS, MS                     | yes                                              |
| Tadini [38]          | <sup>1</sup> H, <sup>13</sup> C                                                      | in solution and solid          | 1D, 2D                      | HA                         | yes                                              |
| Polyakov [39]        | <sup>1</sup> H, <sup>13</sup> C                                                      | solid                          | 1D, 2D                      | HA                         | yes                                              |
| Chen [40]            | <sup>1</sup> H, <sup>13</sup> C                                                      | solid                          | 2D                          | HA                         | yes                                              |
| Cao [41]             | <sup>1</sup> H, <sup>13</sup> C                                                      | solid                          | 2D                          | HA, single SOM, OS         | yes                                              |
| Lodygin [42]         | <sup>13</sup> C                                                                      | solid                          | 1D                          | HA, FA                     | yes                                              |
| Preston [43]         | <sup>13</sup> C, <sup>15</sup> N, <sup>31</sup> P                                    | solid                          | 1D, 2D                      | HS, OS, MS                 | no                                               |
| Simpson [44]         | <sup>1</sup> H, <sup>13</sup> C, <sup>19</sup> F                                     | in solution and solid          | 1D, 2D                      | HA, FA, DOM, OS, MS        | no                                               |
| Vasilevich [45]      | <sup>13</sup> C                                                                      | solid                          | 1D                          | HA, FA                     | yes                                              |
| Aquino [46]          | <sup>13</sup> C                                                                      | solid                          | 1D                          | HA, HS                     | yes                                              |
| Harris [47]          | <sup>1</sup> H, <sup>13</sup> C, <sup>15</sup> N                                     | in solution and solid          | 1D                          | single SOM, DOM            | no                                               |
| Chien [48]           | <sup>1</sup> H, <sup>13</sup> C, <sup>27</sup> Al, <sup>29</sup> Si, <sup>31</sup> P | solid                          | 1D, 2D                      | single SOM, MS             | no                                               |
| Keeler [49]          | <sup>13</sup> C                                                                      | solid                          | 1D                          | HA, FA, humin, HS, OS      | yes                                              |
| Kholodov [50]        | <sup>13</sup> C                                                                      | in solution                    | 1D                          | HA                         | yes                                              |
| Lodygin [51]         | <sup>13</sup> C                                                                      | solid                          | 1D                          | HA, FA                     | yes                                              |
| Ware [52]            | <sup>13</sup> C                                                                      | solid                          | 1D                          | HA                         | yes                                              |
| Busman [53]          | <sup>13</sup> C                                                                      | solid                          | 1D                          | OS                         | yes                                              |
| Tadini [54]          | <sup>13</sup> C                                                                      | solid                          | 1D                          | HS                         | yes                                              |

| First Author             | Atoms Studied                   | NMR Spectrum Acquisition Phase | Multidimensional Techniques | Study Objects <sup>1</sup> | Using the chemical shift ranges given in Table 1 |
|--------------------------|---------------------------------|--------------------------------|-----------------------------|----------------------------|--------------------------------------------------|
| Kovaleva [55]            | <sup>13</sup> C                 | in solution                    | 1D                          | HA, lignin                 | yes                                              |
| Duarte [56]              | <sup>1</sup> H, <sup>13</sup> C | in solution                    | 2D                          | DOM                        | yes                                              |
| Brotto [57]              | <sup>13</sup> C                 | solid                          | 1D                          | lignin, OS                 | yes                                              |
| Ryazanov [58]            | <sup>13</sup> C                 | solid                          | 1D                          | FA                         | yes                                              |
| Liang [59]               | <sup>13</sup> C                 | in solution                    | 1D                          | DOM                        | yes                                              |
| García [60]              | <sup>13</sup> C                 | solid                          | 1D                          | HA                         | yes                                              |
| Dymov [61]               | <sup>13</sup> C                 | solid                          | 1D                          | HA                         | yes                                              |
| Cervantes-Arista [62]    | <sup>1</sup> H, <sup>13</sup> C | solid                          | 1D, 2D                      | HA, FA                     | no                                               |
| Prietzl [63]             | <sup>13</sup> C                 | solid                          | 1D                          | lignin, single SOM, OS, MS | yes                                              |
| Chukov [64]              | <sup>13</sup> C                 | solid                          | 1D                          | HA                         | yes                                              |
| Jafarzadeh-Haghighi [65] | <sup>13</sup> C                 | solid                          | 1D                          | HS                         | yes                                              |
| Zolotareva [66]          | <sup>13</sup> C                 | solid                          | 1D                          | HA                         | yes                                              |
| Kida [67]                | <sup>13</sup> C                 | in solution                    | 1D                          | HA, FA                     | yes                                              |
| Abakumov [68]            | <sup>13</sup> C                 | solid                          | 1D                          | HA                         | yes                                              |
| Diniz [69]               | <sup>13</sup> C                 | solid                          | 1D                          | HA                         | yes                                              |
| Certini [70]             | <sup>13</sup> C                 | solid                          | 1D                          | MS                         | yes                                              |
| Bravo-Escobar [71]       | <sup>1</sup> H                  | in solution                    | 1D                          | DOM                        | no                                               |
| Dymov [72]               | <sup>13</sup> C                 | solid                          | 1D                          | HS                         | yes                                              |
| Dymov [73]               | <sup>13</sup> C                 | solid                          | 1D                          | OS                         | yes                                              |
| Dymov [74]               | <sup>13</sup> C                 | solid                          | 1D                          | OS                         | yes                                              |
| Alexis [75]              | <sup>13</sup> C                 | solid                          | 1D                          | OS                         | yes                                              |
| Hishinuma [76]           | <sup>13</sup> C                 | solid                          | 1D                          | OS                         | yes                                              |
| Kovaleva [77]            | <sup>13</sup> C                 | solid                          | 1D                          | HA, lignin                 | yes                                              |
| Criquet [78]             | <sup>13</sup> C                 | solid                          | 1D                          | MS                         | yes                                              |
| Hannam [79]              | <sup>13</sup> C                 | solid                          | 1D                          | OS                         | yes                                              |
| Lorenz [80]              | <sup>13</sup> C                 | solid                          | 1D                          | MS                         | yes                                              |
| Amoah-Antwi [81]         | <sup>13</sup> C                 | solid                          | 1D                          | HA                         | yes                                              |
| Farrell [82]             | <sup>13</sup> C                 | solid                          | 1D                          | MS                         | yes                                              |
| Zhang [83]               | <sup>13</sup> C                 | solid                          | 1D                          | HA, humin                  | yes                                              |
| Wang [84]                | <sup>13</sup> C                 | solid                          | 1D                          | HA                         | yes                                              |
| Suleymanov [85]          | <sup>13</sup> C                 | solid                          | 1D                          | HA                         | yes                                              |
| Trubetskoi [86]          | <sup>13</sup> C                 | solid                          | 1D                          | HA                         | yes                                              |
| Danchenko [87]           | <sup>13</sup> C                 | solid                          | 1D                          | HA, MS                     | yes                                              |
| Lu [88]                  | <sup>1</sup> H, <sup>13</sup> C | solid                          | 1D                          | HA                         | yes                                              |
| Zhil kibayev [89]        | <sup>13</sup> C                 | in solution                    | 1D                          | humin                      | yes                                              |
| Chabbi [90]              | <sup>13</sup> C                 | solid                          | 1D                          | HS, MS                     | yes                                              |
| Wershaw [91]             | <sup>13</sup> C                 | in solution                    | 1D                          | DOM, OS                    | yes                                              |
| Gehring [92]             | <sup>13</sup> C                 | in solution and solid          | 1D                          | HS, OS                     | yes                                              |
| Vasilevich [93]          | <sup>13</sup> C                 | solid                          | 1D                          | HA, FA                     | yes                                              |
| Vishnyakova [94]         | <sup>13</sup> C                 | in solution                    | 1D                          | HA                         | yes                                              |
| Polyakov [95]            | <sup>13</sup> C                 | solid                          | 1D                          | HA                         | yes                                              |
| Fragouli [96]            | <sup>1</sup> H, <sup>13</sup> C | solid                          | 2D                          | HA, FA                     | yes                                              |
| Nascimento [97]          | <sup>1</sup> H                  | in solution                    | 1D                          | HA, single SOM             | no                                               |

<sup>1</sup> HA – humic acids, FA – fulvic acids, HS – unfractionated humic substances, single SOM – single soil organic substances, DOM – dissolved organic matter, OS – organic soil and MS – mineral soil.

**Table S2.** Included articles focusing on the use of EPR spectroscopy and results of individual sources of evidences.

| First Author              | The nature of SOM paramagnetism | Study Objects <sup>1</sup> |                   | Parameters of the EPR spectra <sup>2</sup> |
|---------------------------|---------------------------------|----------------------------|-------------------|--------------------------------------------|
| Lodygin [98]              | polyconjugation systems         | HA, FA                     | virgin and arable | FRC, gFV                                   |
| Lodygin [99]              | polyconjugation systems         | HA                         | virgin            | FRC, gFV                                   |
| Lishtvan [100]            | polyconjugation systems         | HA                         | virgin            | FRC, gFV, PPLW                             |
| Rosa [101]                | isn't discussed                 | HS                         | virgin            | FRC                                        |
| Debska [102]              | semiquinone structures          | HA                         | virgin            | FRC, gFV, SS, PPLW                         |
| Jezierski [103]           | semiquinone structures          | HA                         | virgin            | FRC, gFV                                   |
| Kurochkina [104]          | semiquinone structures          | HS                         | virgin            | FRC, SS                                    |
| Lodygin [105]             | polyconjugation systems         | HA, FA                     | virgin and arable | FRC                                        |
| Lodygin [106]             | polyconjugation systems         | HA, FA                     | virgin            | FRC, gFV                                   |
| Jezierski [107]           | semiquinone structures          | HA, FA, OS, MS             | virgin            | FRC, gFV                                   |
| Chukov [108]              | isn't discussed                 | HA                         | virgin            | FRC, gFV                                   |
| Gonzalez-Perez [109]      | isn't discussed                 | HA                         | arable            | FRC, gFV                                   |
| Saab [110]                | semiquinone structures          | HA, FA, humin, MS          | virgin            | FRC, SS                                    |
| Barančíková [111]         | isn't discussed                 | HA                         | virgin and arable | FRC                                        |
| Venezia [112]             | isn't discussed                 | HA                         | virgin            | FRC                                        |
| Sun [113]                 | isn't discussed                 | HS                         | arable            | FRC                                        |
| Tadini [114]              | isn't discussed                 | HA                         | arable            | FRC                                        |
| Baltrėnaitė-Gedienė [115] | isn't discussed                 | MS                         | arable            | FRC, gFV                                   |
| Sartakov [116]            | isn't discussed                 | HA                         | virgin            | FRC, gFV                                   |

<sup>1</sup> HA – humic acids, FA – fulvic acids, HS – unfractionated humic substances, OS – organic soil and MS – mineral soil;

<sup>2</sup> FRC – free radical concentration, gFV – g-factor value, SS – spectral shape and PPLW – peak-to-peak line width.
